# Butyrate alleviates high fat diet-induced obesity through activation of adiponectin-mediated pathway and stimulation of mitochondrial function in the skeletal muscle of mice

Jian Hong<sup>1,3,\*</sup>, Yimin Jia<sup>1,\*</sup>, Shifeng Pan<sup>1</sup>, Longfei Jia<sup>1</sup>, Huifang Li<sup>1</sup>, Zhenqiang Han<sup>1</sup>, Demin Cai<sup>1</sup> and Ruqian Zhao<sup>1,2</sup>

<sup>1</sup> Key Laboratory of Animal Physiology & Biochemistry, Nanjing Agricultural University, Nanjing, P. R. China

<sup>2</sup> Jiangsu Collaborative Innovation Center of Meat Production and Processing, Quality and Safety Control, Nanjing, P. R. China

<sup>3</sup> College of Life Science and Technology, Yancheng Teachers University, Yancheng, P. R. China

\* These authors contributed equally to this work

Correspondence to: Zhao Ruqian, email: zhao.ruqian@gmail.com

Keywords: mitochondria function, adipoR1, adipoR2, sodium butyrate, obesity, Pathology Section

Received: May 09, 2016

Accepted: July 28, 2016

Published: August 12, 2016

## ABSTRACT

Dietary supplementation of butyrate can prevent diet-induced obesity through increasing mitochondrial function in mice, yet the up-stream signaling pathway remains elusive. In this study, weaned mice were divided into two groups, fed control (CON) and high-fat diet (HF, 45% energy from fat), respectively, for 8 weeks. HF-induced obese mice, maintained on HF diet, were then divided into two groups; HFB group was gavaged with 80 mg sodium butyrate (SB) per mice every other day for 10 days, while the HF group received vehicle. It was shown that five gavage doses of SB significantly alleviated HF diet-induced obesity and restored plasma glucose, insulin and leptin to control levels. Muscle contents of ADP and AMP were significantly increased, which was associated with enhanced mitochondrial oxidative phosphorylation and up-regulated expression of fatty acid oxidation enzymes and uncoupling proteins, UCP2 and UCP3 in the skeletal muscle. SB significantly enhanced the expression of adiponectin receptors (adipoR1/2) and AMP kinase (AMPK), while diminished the expression of histone deacetylase 1 (HDAC1). Higher H3K9Ac, a gene activation histone mark, was detected on the promoter of *AdipoR1/2*, *Ucp2* and *Ucp3* genes that were activated in the muscle of SB-treated obese mice. Our results indicate that short-term oral administration of SB can alleviate diet-induced obesity and insulin resistance in mice through activation of adiponectin-mediated pathway and stimulation of mitochondrial function in the skeletal muscle.

## INTRODUCTION

Skeletal muscles comprise approximately 50% of the body weight and account for ~80% of insulin-stimulated glucose uptake [1, 2], therefore playing critical roles in whole-body energy balance and glucose homeostasis [3]. High-fat diet-induced obesity often causes insulin resistance [4, 5], which is associated with decreased mitochondrial oxidative capacity and ATP synthesis in the skeletal muscle [6-9]. Conversely, improved skeletal muscle mitochondrial function contributes to enhanced fatty acids  $\beta$ -oxidation and higher insulin sensitivity [10-12]. Therefore, mitochondrial function in skeletal muscle serves as a target for the treatment of high-fat diet-induced obesity and insulin resistance.

Butyrate is a short-chain fatty acid produced from anaerobic bacteria fermentation of dietary fibers in the colon [13]. Butyrate functions not only as a nutrient, but also as a signal to regulate various cellular activities [14]. Firstly, butyrate acts as a histone deacetylase (HDAC) inhibitor to participate in the epigenetic gene regulation [15]; Secondly, butyrate can activate its G protein-coupled receptors, GPR41 and GPR43, to regulate the metabolism and cell fate [16]. Dietary supplementation of butyrate has been shown to prevent high-fat diet-induced obesity and insulin resistance in mice [17-19] or non-alcoholic fatty liver disease in rats [20], through a mechanism related to promotion of energy expenditure and induction of mitochondrial function. In these studies, butyrate was administered together with the high-fat diet

**Table 1: The primer of genes for RT-PCR, mtDNA copy number, and ChIP analysis**

| Primer names    | Sequences              | Used for            |
|-----------------|------------------------|---------------------|
| COX1            | ATGTTCTATCAATGGGAGC    | mRNA quantification |
|                 | TCTGAGTAGCGTCGTGGT     |                     |
| COX2            | AGACGAAATCAACAACCC     | mRNA quantification |
|                 | GGAAGTTCTATTGGCAGA     | mtDNA copy number   |
| COX3            | CGAAACCACATAAATCAAG    | mRNA quantification |
|                 | AGTAGGCAAAACAATAAGGA   |                     |
| ND1             | CACTATTCGGAGCTTTACG    | mRNA quantification |
|                 | TGTTTCTGCTAGGGTTGA     |                     |
| ND2             | ACAACCCATCCCTCACTC     | mRNA quantification |
|                 | ATTTTGGTAAGAATCCTGTT   |                     |
| ND3             | CCTAACGCTAATTCTAGTTG   | mRNA quantification |
|                 | GACGTGCAGAGCTTGTAG     |                     |
| ND4             | TCCTCAGTTAGCCACATAGCA  | mRNA quantification |
|                 | AGGCAGAATAGGAGTGATGATG |                     |
| ND4L            | CTATCACTTCTAGGGACACTT  | mRNA quantification |
|                 | TAGGGCTAGTCCTACAGC     |                     |
| ND5             | ATAACCGCATCGGAGACA     | mRNA quantification |
|                 | TGGTAGTCATGGGTGGAG     |                     |
| ND6             | ACAAAGATCACCCAGCTA     | mRNA quantification |
|                 | GGAGTTATGTTGGAAGGA     |                     |
| ATP6            | AACCTGGTGAACCTACGAC    | mRNA quantification |
|                 | GATGTTACTGTTGCTTGAT    |                     |
| ATP8            | ATGCCACAACCTAGATACAT   | mRNA quantification |
|                 | TAGTGATTTGGTGAAGG      |                     |
| CYTB            | CTGTTTCGCAGTCATAGCC    | mRNA quantification |
|                 | AAGAATCGGGTCAAGGTG     |                     |
| PGC-1 $\alpha$  | ACACCGCAATTCTCCCTTGT   | mRNA quantification |
|                 | CGGCGCTCTTCAATTGCTTT   |                     |
| UCP2            | ATCTGGTCATTGTTGTTAGGT  | mRNA quantification |
|                 | GGTCTCTGCTATGCTGTT     |                     |
| UCP3            | ACACTTCCTCCTGCTCTC     | mRNA quantification |
|                 | AGTCCATTCTGTCCTTCCA    |                     |
| CPT-1b          | CAAACTACACGCATCCC      | mRNA quantification |
|                 | CACTCTACCCTTCCTCTG     |                     |
| Leptin receptor | TGTAAACTGGGACATAGAG    | mRNA quantification |
|                 | AGGGGTTCTTAGGTAATG     |                     |
| AdipoR1         | GCTGAAAGACAACGACTACC   | mRNA quantification |
|                 | GTCAAGATTCCCAGAAAGAG   |                     |
| AdipoR2         | GTGTTTTCTTGGTCGTCG     | mRNA quantification |
|                 | TGCGTCTGGCTGCTGATA     |                     |
| PPAR $\alpha$   | GGGTGGTTGAATCGTGAG     | mRNA quantification |
|                 | CTTCTCCTGCCTTTTGC      |                     |
| PPIA            | GCAAGACCAGCAAGAAGA     | mRNA quantification |
|                 | CAGTGAGAGCAGAGATTACA   | mtDNA copy number   |
| AdipoR1         | TTCCATACATAGCATACCAG   | ChIP                |
|                 | CATCCTATCTCAGCCTTT     |                     |
| AdipoR2         | GAATAGCAGCACTTTTGG     | ChIP                |
|                 | CGGGCTTTCAGTATGTCT     |                     |
| UCP2            | CGGGGCTAAGGAGGATAA     | ChIP                |
|                 | CCTCAGCGAGATAATGGC     |                     |
| UCP3            | CAAGCCTAAGGGGTAAAG     | ChIP                |
|                 | ACAAATTGGGCATGTCGT     |                     |

**Table 2: Body, liver, gastrocnemius muscle and epididymal fat weight**

| Parameters                           | Control (n = 8) | HF (n = 8)    | HFB (n = 8)   |
|--------------------------------------|-----------------|---------------|---------------|
| Initial body weight <sup>1</sup> (g) | 23.65 ± 0.47c   | 31.72 ± 0.62a | 31.35 ± 0.80a |
| Final body weight <sup>2</sup> (g)   | 23.20 ± 0.53c   | 32.46 ± 0.50a | 28.35 ± 0.58b |
| Liver weight (g)                     | 1.10 ± 0.03b    | 1.24 ± 0.03a  | 1.08 ± 0.04b  |
| Gastrocnemius muscle weight (g)      | 0.29 ± 0.01b    | 0.35 ± 0.01a  | 0.32 ± 0.02ab |
| Epididymal fat weight (g)            | 0.43 ± 0.04c    | 1.33 ± 0.13a  | 0.81 ± 0.08b  |
| Liver index                          | 4.76 ± 0.13a    | 3.84 ± 0.10b  | 3.83 ± 0.13b  |
| Gastrocnemius muscle index           | 1.26 ± 0.08a    | 1.07 ± 0.04b  | 1.13 ± 0.06ab |
| Epididymal fat index                 | 1.83 ± 0.15c    | 4.06 ± 0.37a  | 2.83 ± 0.22b  |

<sup>1</sup> Body weight before SB treatment; <sup>2</sup> Body weight after SB treatment.

Data are means ± SEM.

Mean values not sharing the same letters are significantly different,  $P < 0.05$ .

HF, high-fat diet; HFB, high-fat diet gavaged with sodium butyrate.

for prolonged periods during the induction of disease models to demonstrate its preventive actions. However, the efficacy of butyrate in the treatment of obesity and insulin resistance in established obese model was only lightly mentioned in one study without further mechanistic analysis [19].

Adiponectin is an adipocyte-derived cytokine with a prominent function in improving insulin sensitivity [21, 22], via targeting on mitochondrial functions [23, 24]. The anti-obesity and insulin-sensitizing actions of adiponectin are mediated by its receptors occurring in two isoforms, adipoR1 and adipoR2 [25]. The down-stream signaling of adiponectin receptors involves activation of 5'-adenosine monophosphate-activated protein kinase (AMPK) [26] and peroxisome proliferator-activated receptor- $\alpha$  (PPAR $\alpha$ ) [27], which subsequently induces mitochondria biogenesis and enhances fatty acid oxidation [28]. Nevertheless, it has not been explored whether adiponectin-mediated pathway is involved in the anti-obesity action of butyrate.

Thus, here we test our hypothesis that adiponectin-mediated pathway contributes to the therapeutic effects of butyrate on a high-fat diet-induced obese mouse model. We show that a short-term oral administration of sodium butyrate was able to alleviate obesity and increase insulin sensitivity through promotion of skeletal muscle mitochondrial function and fatty acid oxidation. Furthermore, we provide evidences that HDAC1 inhibition and histone hyperacetylation on the promoter of genes encoding adiponectin receptors and uncoupling proteins may contribute to butyrate activity.

## RESULTS

### Sodium butyrate reduces body weight gain and improves glucose tolerance

The obese mouse model was established 8 weeks after feeding the high-fat diet, with significantly ( $P < 0.05$ ) higher body weight compared to the mice fed control diet (Figure 1A, 1B). Five gavage doses of SB alleviated glucose intolerance (Figure 1C, 1D). The body weight and the epididymal fat mass were significantly ( $P < 0.05$ ) reduced in HFB group compared to HF group (Table 2).

### Sodium butyrate restores plasma level of insulin and leptin and reduces lipid deposition in the muscle

Plasma concentration of glucose, insulin and leptin was significantly ( $P < 0.05$ ) elevated in HF group, which was completely restored to control levels by SB treatment. Plasma levels of Tch and HDL-c were significantly ( $P < 0.05$ ) higher in HF group, which remained high after SB treatment. Plasma concentrations of TG, LDL-c and NEFA were not affected by high-fat diet or SB treatment (Table 3). Muscle content of TG and Tch was significantly higher ( $P < 0.05$ ) in HF mice, which was significantly ( $P < 0.05$ ) reduced by SB treatment (Table 4).

**Table 3: The biochemical and hormone parameters in plasma**

| Parameters      | Control (n = 8) | HF (n = 8)    | HFB (n = 8)   |
|-----------------|-----------------|---------------|---------------|
| GLU (mmol/L)    | 12.36 ± 0.59b   | 14.69 ± 0.59a | 11.43 ± 0.53b |
| TG (mmol/L)     | 0.20 ± 0.04     | 0.27 ± 0.02   | 0.24 ± 0.02   |
| Tch (mmol/L)    | 2.51 ± 0.13b    | 3.16 ± 0.06a  | 3.22 ± 0.10a  |
| HDLc (mmol/L)   | 1.72 ± 0.11b    | 2.42 ± 0.06a  | 2.41 ± 0.11a  |
| LDLc (mmol/L)   | 0.52 ± 0.05     | 0.45 ± 0.02   | 0.50 ± 0.03   |
| NEFA (μmol/L)   | 858.4 ± 30.09   | 824.6 ± 68.19 | 887.4 ± 44.22 |
| Insulin (ng/mL) | 1.51 ± 0.17b    | 2.39 ± 0.30a  | 1.25 ± 0.09b  |
| Leptin (ng/mL)  | 1.45 ± 0.19b    | 3.71 ± 0.62a  | 1.50 ± 0.26b  |

Data are means ± SEM.

Mean values not sharing the same letters are significantly different,  $P < 0.05$ .

HF, high-fat diet; HFB, high-fat diet gavaged with sodium butyrate; GLU, glucose; TG, triglyceride; Tch, total cholesterol; LDLc, LDL-cholesterol; HDLc, HDL-cholesterol; NEFA, non-esterified fatty acid.

### Sodium butyrate improves mitochondrial function and fatty acid β-oxidation

Although myofiber types were not affected (data not shown), muscle content of ADP and AMP was significantly

( $P < 0.05$ ) increased, and that of ATP was numerically increased in SB-treated obese mice, as compared to Con and HF counterparts (Table 4). The reduced muscle lipid content in HFB group was associated with a significant ( $P < 0.05$ ) up-regulation of mRNA expression for

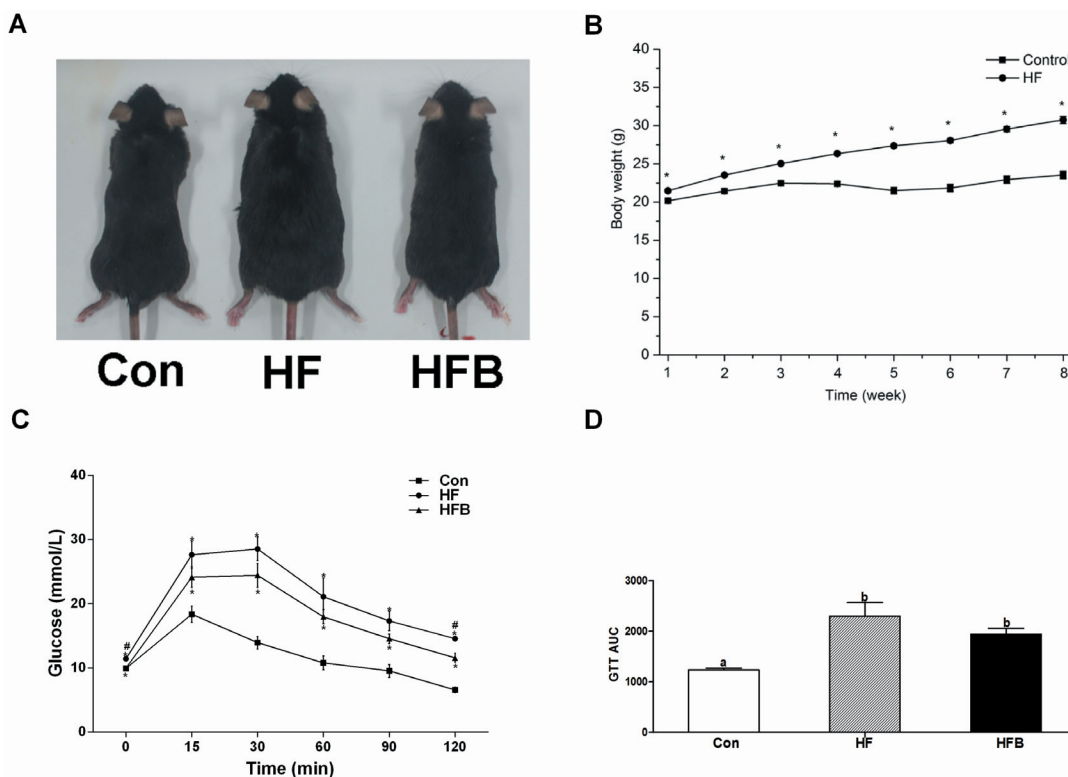

**Figure 1: Sodium butyrate reduces body weight gain and improves glucose tolerance.** A. Phenotype of C57BL/6 mice. B. Changes in body weight in C57BL/6 mice during 8 weeks' high-fat diet feeding. C. Mean blood glucose levels following GTT ( $n = 8$ ). D. Area under the glucose-time curve (AUC). Control: normal control diet, HF: high fat diet, HFB: high fat diet gavage with Sodium Butyrate. The results were expressed as means ± SEM, \* indicates the differences compared to the control and # indicates the differences between HF and HFB. Mean values not sharing the same letters are significantly different,  $P < 0.05$ .

**Table 4: The triglyceride, total cholesterol and ATP, AMP, ADP concentrations in gastrocnemius muscle**

| Parameters    | Control (n = 8) | HF (n = 8)    | HFB (n = 8)   |
|---------------|-----------------|---------------|---------------|
| TG (ng/mg)    | 7.30 ± 1.28a    | 16.34 ± 2.88b | 10.34 ± 0.98c |
| Tch (ng /mg)  | 1.49 ± 0.26a    | 3.32 ± 0.59b  | 2.10 ± 0.20c  |
| ATP (ng/mg)   | 3.14 ± 0.53a    | 4.45 ± 0.30ab | 5.36 ± 0.50b  |
| ADP (ng/mg)   | 1.03 ± 0.13a    | 1.52 ± 0.10a  | 2.02 ± 0.24b  |
| AMP (ng/mg)   | 0.31 ± 0.01a    | 0.33 ± 0.01a  | 0.42 ± 0.05b  |
| Energy charge | 0.80 ± 0.01     | 0.83 ± 0.01   | 0.82 ± 0.01   |

Data are means ± SEM.

Mean values not sharing the same letters are significantly different,  $P < 0.05$ .

HF, high-fat diet; HFB, high-fat diet gavaged with sodium butyrate; TG, triglyceride; Tch, total cholesterol; ATP, adenosine 5'-triphosphate; ADP, adenosine 5'-diphosphate; AMP, adenosine 5'-phosphate; Energy charge =  $([ATP] + 1/2[ADP])/([ATP] + [ADP] + [AMP])$ .

hormone sensitive lipase (*Hsl*) and lipoprotein lipase (*Lpl*) (Figure 2A). Moreover, key genes involved in mitochondrial thermogenesis and fatty acid  $\beta$ -oxidation, such as uncoupling protein 2 (*UCP2*), uncoupling protein 3 (*UCP3*), carnitine palmitoyl transferase Ib (*CPT-1b*) and *PGC1 $\alpha$* , were all increased significantly ( $P < 0.05$ ) at both mRNA (Figure 2B) and protein levels (Figure 2C, 2D). Furthermore, although mtDNA copy number was not affected (data not shown), 12 out of 13 mtDNA-encoded genes (Figure 2E) involved in oxidative phosphorylation (OXPHOS), as well as *COX4* protein (Figure 2F) were significantly ( $P < 0.05$ ) up-regulated in the HFB group compared to control and HF groups.

### Sodium butyrate activates adiponectin signaling pathway

SB treatment significantly ( $P < 0.05$ ) increased the mRNA expression of *Leptin receptor* (Figure 3A), yet the protein content was not altered (Figure 3B). In contrast, *adipoR1* and *adipoR2* were significantly ( $P < 0.05$ ) increased after SB treatment at both mRNA (Figure 3C) and protein levels (Figure 3D), although adiponectin content in the plasma (Figure 3E) and gastrocnemius muscle (Figure 3F) did not change. Accordantly, the two main down-stream signaling pathways of adiponectin receptors, *PPAR $\alpha$*  and *AMPK*, were activated. *PPAR $\alpha$*  was up-regulated at the level of mRNA (Figure 3G), but not the protein (Figure 3H). SB treatment significantly ( $P < 0.05$ ) increased the protein content of phosphorylated *AMPK* (p-*AMPK*), leading to enhanced ratio of p-*AMPK*/*AMPK* (Figure 3I).

### Sodium butyrate suppresses HDAC1 expression and modifies histone acetylation

Butyrate acts as a histone deacetylase (HDAC) inhibitor or through binding to its G protein-coupled receptors, *GPR41* and *GPR43*. The protein content of *GPR43* and *GPR41* in gastrocnemius muscle was not affected by either high-fat diet or SB treatment (Figure 4A, 4B). However, the expression of *HDAC1* was significantly ( $P < 0.05$ ) decreased in HFB group (Figure 4C). Furthermore, ChIP analysis detected significant increase of *H3K9Ac*, a hallmark of gene activation, on the promoter of *Adipor1*, *Adipor2*, *Ucp2* and *Ucp3* genes (Figure 4D).

## DISCUSSION

Butyrate has been reported to protect animals from high-fat diet-induced obesity and insulin resistance [17-19, 29-31]. Here, we provide the evidence that short-term oral administration (5 gavage doses in 10 days) of SB is effective in the treatment of HF diet-induced obesity and glucose intolerance, in a different experimental setting. In previous studies, butyrate was administered during the induction of disease models to demonstrate its preventive functions. The efficacy of butyrate in the treatment of established obesity and insulin resistance was lightly mentioned only in one of these studies in which a 5-week dietary butyrate supplementation was shown effective [19]. Several factors may contribute to the disparities in the effective dose and duration of SB administration. Firstly, compared to long-term dietary supplementation of butyrate ( $5 \text{ g}\cdot\text{kg}^{-1}\cdot\text{day}^{-1}$ ) in other studies [17-19, 29], 5 gavage doses of SB at 80 mg per mice in this study may ensure higher bioavailability. Secondly, in this study 3-week-old male C57BL/6J mice were fed HF diet for 8 weeks to induce obesity, whereas in other studies, older



mice (4-8 weeks of age) were used and obesity was induced by feeding high-fat diet for longer period (9-12 weeks) [17-19, 29]. Therefore, compared to the severe obese model in other studies, the model established in this study may resemble a mild obesity or prediabetes condition, which is commonly seen in human society and clinical situations.

The mechanism of butyrate action for obesity and insulin resistance is related to promotion of energy expenditure and induction of mitochondrial function. AMPK and PGC-1 $\alpha$  have been suggested to mediate the effects of butyrate to increase fatty acid  $\beta$ -oxidation

and enhance mitochondrial uncoupling [17, 19]. In agreement with these previous publications, we also detected significant activation of AMPK and PGC-1 $\alpha$ , in association with up-regulated expression of genes involved in lipolysis, fatty acid  $\beta$ -oxidation, mitochondria OXPHOS and mitochondria uncoupling after a short-term oral SB treatment in a HF diet-induced mouse model.

In this study, obesity and glucose intolerance were evident after 8-weeks feeding with high-fat diet, which is indicated by significantly increased body weight, elevated fasting blood glucose level, higher plasma leptin and insulin concentrations, as well as diminished oral glucose

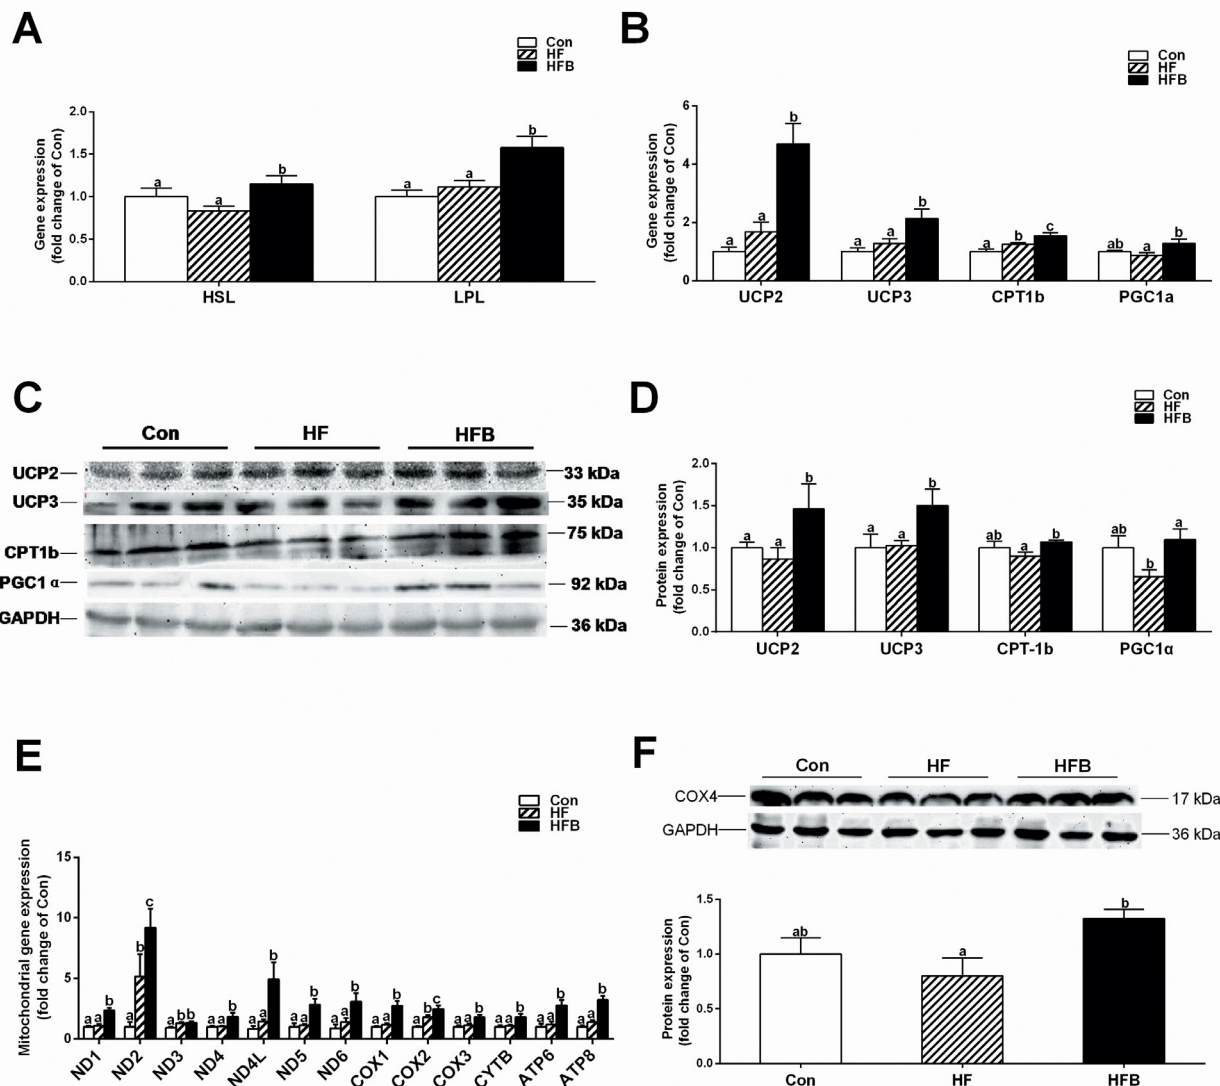

**Figure 2: Sodium butyrate improves mitochondrial function and fatty acid  $\beta$ -oxidation.** A. The mRNA expression of *Hsl* and *Lpl* in gastrocnemius muscle ( $n = 10$ ). B. The mRNA expression of key genes involved in mitochondrial thermogenesis and fatty acid  $\beta$ -oxidation in gastrocnemius muscle ( $n = 10$ ). C., D. The protein expression of key genes involved in mitochondrial thermogenesis and fatty acid  $\beta$ -oxidation in gastrocnemius muscle ( $n = 6$ ). E. The mRNA expression of mtDNA-encoded genes involved in oxidative phosphorylation (OXPHOS) in gastrocnemius muscle ( $n = 10$ ). F. The protein expression of COX4 in gastrocnemius muscle ( $n = 6$ ). The results were expressed as means  $\pm$  SEM. Mean values not sharing the same letters are significantly different,  $P < 0.05$ .

tolerance. Mice fed high-fat diet were reported to show significantly decreased expression of mitochondrial biogenesis genes [8] and impaired mitochondrial function and  $\beta$ -oxidation activities in skeletal muscle [7, 9, 32]. Also, high-fat diet fed mice exhibit inhibition of glucose uptake through inactivated AMPK signaling pathways in skeletal muscle [33]. Surprisingly, however, the expression of genes involved in lipolysis,  $\beta$ -oxidation, mitochondrial OXPHOS or mitochondria uncoupling was not altered in obese mice compared to their lean counterparts in this study. It is speculated that, compared to other tissues such as adipose tissue and liver, skeletal muscles are less vulnerable to the influence of high-fat diet in a condition of mild obesity. Nevertheless, it may not be true because muscle lipid contents including TG and Tch were significantly higher in obese mice compared to the control. Therefore, genes responsible for lipid synthesis and transport may be modulated in obese mice. However, this

is beyond the scope of this study that was aimed to explore the up-stream signaling pathway of butyrate function.

The most striking effect of SB in this study is to restore the plasma leptin and insulin to control levels. Obviously this attributes to the potential actions of butyrate on adipose tissue and pancreatic  $\beta$  cells that secrete leptin and insulin, respectively. Certainly possible modulation of the clearance or turnover cannot be excluded. However, this study was focused on skeletal muscle, an important target of these hormones. To our disappointment, no consistent responses to SB treatment were detected for insulin receptor (data not shown) or leptin receptor that changed only at the level of mRNA. Unexpectedly, however, both adiponectin receptors, *adipoR1* and *adipoR2*, were found to be up-regulated after SB treatment, at both mRNA and protein levels. Although both leptin and adiponectin are secreted from adipose tissue, the two adipokines behave differently in

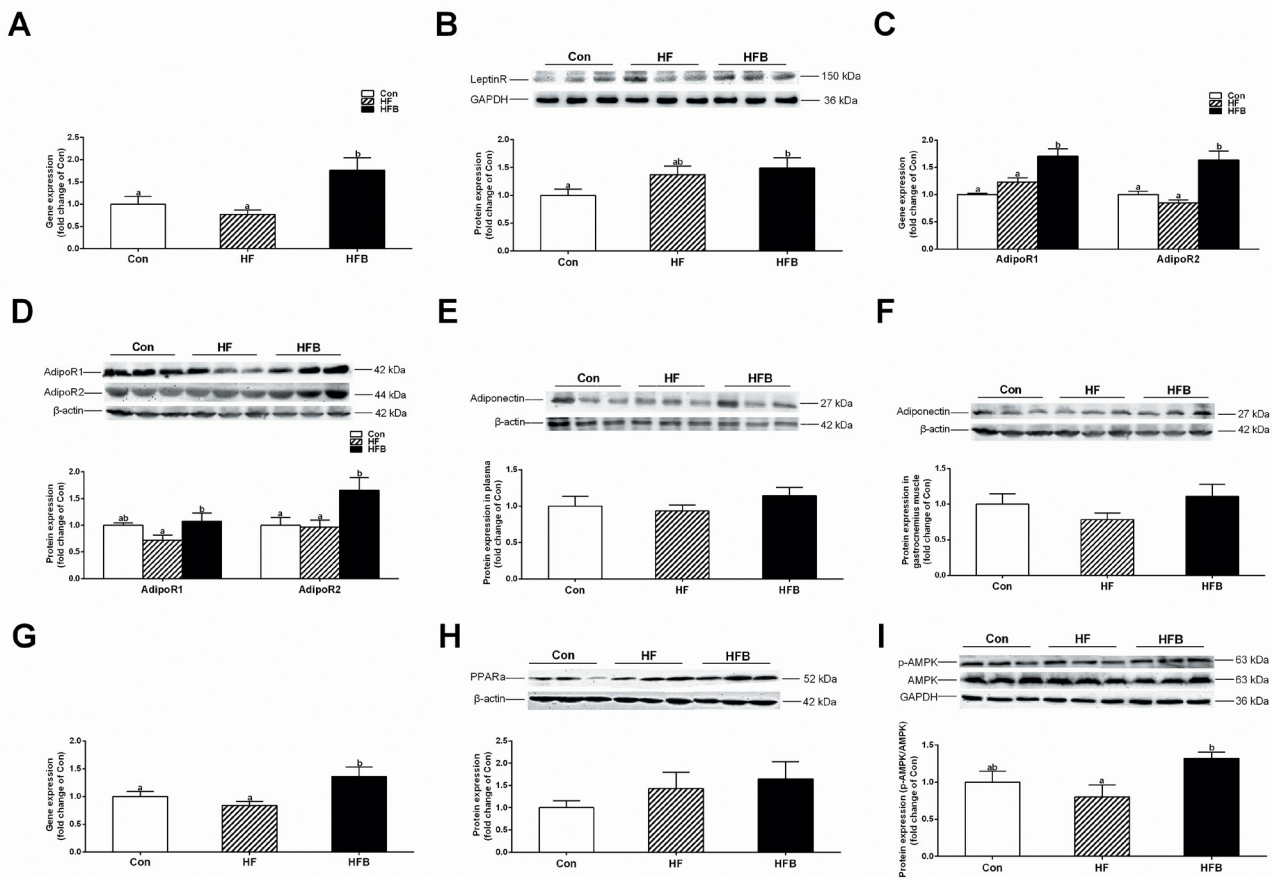

**Figure 3: Sodium butyrate activates adiponectin signal pathway in gastrocnemius muscle.** A. The mRNA expression of *Leptin receptor* in gastrocnemius muscle ( $n = 10$ ). B. The protein expression of leptin receptor in gastrocnemius muscle ( $n = 6$ ). C. The mRNA expression of *AdipoR1* and *AdipoR2* in gastrocnemius muscle ( $n = 10$ ). D. The protein expression of adiponectin receptors in gastrocnemius muscle ( $n = 6$ ). E. The protein expression of adiponectin in plasma ( $n = 6$ ). F. The protein expression of adiponectin in gastrocnemius muscle ( $n = 6$ ). G. The mRNA expression of *Ppara* in gastrocnemius muscle ( $n = 10$ ). H. The protein expression of PPAR $\alpha$  in gastrocnemius muscle ( $n = 6$ ). I. The protein expression of p-AMPK in gastrocnemius muscle ( $n = 6$ ); Control: normal control diet, HF: high fat diet, HFB: high fat diet gavage with Sodium Butyrate. The results were expressed as means  $\pm$  SEM, Mean values not sharing the same letters are significantly different,  $P < 0.05$ .

high-fat diet-induced obesity. Obese mice had significantly elevated plasma leptin level that was completely restored by SB treatment, whereas adiponectin concentration in the plasma and skeletal muscle was not altered in obese mice or affected by SB treatment. This observation implicates different regulatory mechanisms for the secretion and action of leptin and adiponectin, in response to high-fat diet and SB treatment.

The down-stream signaling of adiponectin receptors has been well documented. In this study, activation of AMPK appears to be the main pathway responsible for the beneficial effects of SB on obesity and insulin resistance. However, how SB induces activation of adiponectin receptors has not been elucidated. Several studies have addressed the transcriptional regulation of *Adipor1* and *Adipor2* genes. Nuclear inhibitory protein (NIP) [34] and activating transcription factor 3 (ATF3) [35] are reported to repress the promoter activity of *Adipor1* gene, whereas PPAR $\gamma$  agonist, growth hormone and SIRT1-Foxo1 signaling are shown to stimulate the promoter activity of *Adipor2* gene [36, 37].

To understand how sodium butyrate up-regulates the expression of adiponectin receptors, we explored both

mechanisms known to mediate butyrate action, inhibition of HDAC [15] and activation of GPR41 and GPR43 [16]. It appears that SB exerts its function in this study mainly as an HDAC inhibitor, as neither GPR41 nor GPR43 was modulated by butyrate treatment. It has been shown that butyrate prevents inhibition of promoter activity by suppression of histone deacetylase [19]. In this study, H3K9Ac, a gene activation mark, was found to be highly enriched in the promoter of *Adipor1*, *Adipor2*, *Ucp2* and *Ucp3* genes that are up-regulated by SB treatment. Certainly, the coincidence and the association analysis of all the events observed in the present study are not adequate to draw a comprehensive picture of the signaling pathway underlying butyrate action. A more detailed mechanistic study using loss of function and gain of function strategies is required to delineate the cause and consequences. Also, skeletal muscle is not a sole target for sodium butyrate when administered systematically. The actions of sodium butyrate and the underlying mechanisms in other target tissues could be very different and it merits future investigations how different tissues respond in concert to butyrate to achieve the general beneficial effects on obesity and glucose intolerance.

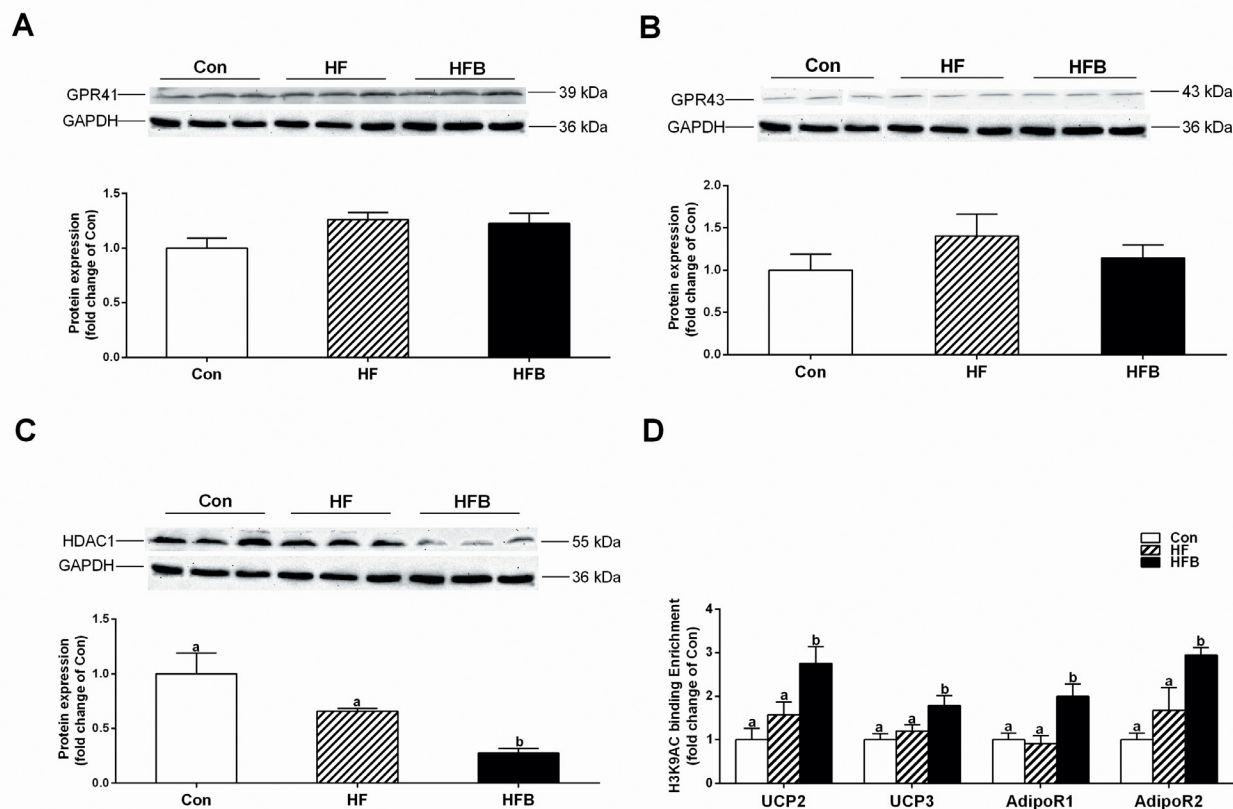

**Figure 4: Sodium butyrate suppresses HDAC1 expression and modifies histone acetylation.** A. The protein expression of GPR41 in gastrocnemius muscle ( $n = 6$ ). B. The protein expression of GPR43 in gastrocnemius muscle ( $n = 6$ ). C. The protein expression of HDAC1 in gastrocnemius muscle ( $n = 6$ ). D. Chromatin immunoprecipitation (ChIP) analyses of histone modifications on the gene promoter of *Adipor1*, *Adipor2*, *Ucp2* and *Ucp3* ( $n = 4$ ). Control: normal control diet, HF: high fat diet, HFB: high fat diet gavage with Sodium Butyrate. The results were expressed as means  $\pm$  SEM. Mean values not sharing the same letters are significantly different,  $P < 0.05$ .



In summary, this study provides a better understanding of the signaling pathways through which butyrate alleviates obesity and improves glucose tolerance in a high-fat diet-induced obese mouse model. The fact that a short-term oral administration of SB is effective in alleviate diet-induced mild obesity in mice may encourage future investigation of butyrate and its derivatives in the treatment and prevention of obesity-related metabolic disorders in humans.

## **MATERIALS AND METHODS**

### **Animal models and experimental protocols**

Thirty six male specific pathogen-free (SPF) C57BL/6J (3-week-old, 8-10 g) mice were obtained from the Comparative Medicine Center of Yangzhou University (Yangzhou, China, certificate of quality is SCXK (Su) 2012-0004) and fed in the Laboratory Animal Center of Jiangsu Province Integrative Medicine Hospital. The mice were housed in a controlled environment ( $22 \pm 3^\circ\text{C}$ , 50-60% relative humidity) with a 12L:12D lighting cycle and allowed to adapt to their environment for one week. Then mice were randomly assigned to two groups; one was fed a control diet (Con,  $n = 12$ ) and another was fed a high-fat diet (HF, 45% energy from fat,  $n = 24$ ) for 8 weeks to establish obesity. The mice were fed ad libitum with free access to water and weighed once per week. HF-induced obese mice maintained on HF diet were divided into two groups ( $n = 12$ ); HFB group was gavaged with 80 mg sodium butyrate (SB) in 1 ml deionized water per mice every other day for 10 days, while the HF group received vehicle. Mice in the control group were kept continually on a normal diet for the whole experiment. The mice were fasted overnight before sampling. The blood and gastrocnemius muscle samples were collected and stored at  $-80^\circ\text{C}$ . All the procedures were approved by the Animal Ethics Committee of Nanjing Agricultural University, with the project number 2012CB124703. The slaughter and sampling procedures complied with the "Guidelines on Ethical Treatment of Experimental Animals" (2006) No. 398 set by the Ministry of Science and Technology, China.

### **Glucose tolerance test**

Eight mice from each group were used for the glucose tolerance test. They were fasted for 10 h (from 8:30 am till 18:30 pm), and were injected intraperitoneally with 2.5 g/kg glucose (G7021; Sigma). The blood glucose levels before glucose injection (0 min) and 15, 30, 60, 90, and 120 min after glucose injection were determined.

### **Plasma concentration of biochemical parameters and hormones**

Plasma concentration of glucose (GLU), triglycerides (TG), total cholesterol (Tch), high-density lipoprotein cholesterol (HDL-c), low-density lipoprotein cholesterol (LDL-c) and non-esterified fatty acid (NEFA) was detected with automatic biochemical analyzer (Hitachi 7020; HITACHI) using commercial assay kits (995-18311, 995-33093, 999-33493, 998-09011, 993-39993 and 995-09901, respectively; Wako Pure Chemical Industries, Ltd. Wako). Plasma concentration of insulin (no.96-416) and leptin (no.96-421) were measured by China Biomarker Service, Luminex 200 (no. CNBMSLX200) using Magnetic Bead MAPmate (Merck & Millipore, Darmstadt, Germany) according to the instruction provided by the manufacturer.

### **Content of triglycerides and total cholesterol in gastrocnemius muscle**

Muscle content of TG (E1013; Applygen Technologies, Inc.) and Tch (E1015; Applygen Technologies, Inc.) was measured using respective commercial assay kits following the manufacturer's instruction.

### **ATP, ADP and AMP levels in gastrocnemius muscle**

Muscle content of ATP, ADP and AMP was determined by high performance liquid chromatography (HPLC) according to previous publications with some modifications [38, 39]. Tissue extracts were prepared from frozen muscle using 0.6 mol/l perchloric acid, and the extracts were centrifuged at  $10,000 \times g$  for 10 min at  $4^\circ\text{C}$ . The ATP (FLAAS), ADP (A5285) and AMP (01930) standards were purchased from Sigma. HPLC was performed with A reverse-phase column (99603, C18, 5 mm, 25064.6 mm, Dikma Technologies Inc.). The column temperature was set at  $25^\circ\text{C}$ . For metabolites measurements, a mobile phase consisting of 215 mmol/l  $\text{KH}_2\text{PO}_4$ , 1.2 mmol/l tetrabutylammonium bisulfate, 1% acetonitrile (pH 6.0) was used and the flow rate was maintained at  $1.0 \text{ ml} \cdot \text{min}^{-1}$  by a HPLC pump (600E, Waters). Eluted samples were detected at 254 nm with a dual  $\lambda$  absorbance detector (2478, Waters). Calibration curves were prepared by a six-point standard (0.2, 0.1, 0.05, 0.0125 and 0.00625  $\text{mg} \cdot \text{ml}^{-1}$ ) of ATP, ADP and AMP in 0.6 mol/l perchloric acid, respectively.

## Determination of mtDNA copy number

Total genomic DNA was isolated from muscle samples and the mtDNA copy number was determined using real-time PCR. For DNA extraction, muscle samples were incubated in a lysis buffer containing 0.5 mmol/l of EDTA, pH 8.0 and 2 mg/ml of proteinase K (Amresco, USA) at 37°C overnight. Primers specific for the control region of mitochondrial DNA (mtDNA) were used for the quantification of mtDNA, whereas primers specific for the nuclear gene peptidylprolyl isomerase A (*Ppia*) were used for standardization. Relative mtDNA copy number was calculated with  $2^{-\Delta\Delta C_t}$  method [40].

## RNA isolation and quantitative real-time PCR

Total RNA was extracted from frozen gastrocnemius muscle samples (40 mg) using TRIzol reagent (15596026, Invitrogen) according to the manufacturer's protocol. Two micrograms of RNA were used to generate cDNA by PrimeScript® 1st Strand cDNA Synthesis Kit (D6110A, Takara). *Ppia* was used as an internal control. The resulting cDNA was diluted 1:25 and 2 µL of diluted cDNA was used as template in PCR reactions on a real-time PCR system (Mx3000P, Stratagene, USA). All primers were synthesized by Generey Biotech and listed in Table 1. The  $2^{-\Delta\Delta C_t}$  method was used to analyze real-time PCR data [40].

## Western blotting

Total protein was extracted from 40 mg frozen gastrocnemius muscle samples as previously described [41]. Protein concentration was measured with a Pierce BCA Protein Assay kit (23225; Thermo Scientific). Antibodies and their sources are: Adiponectin (BS6961, Bioworld), AdipoR1 (BS6797, Bioworld), AdipoR2 (14361-1-AP, Proteintech), AMPK $\alpha$ 112 (BS1009, Bioworld), p-AMPK $\alpha$ 1/2 (sc-33524, Santa Cruz), PGC-1 $\alpha$  (sc-13067, Santa Cruz), UCP3 (BS2849, Bioworld), UCP2 (BS2917, Bioworld), GPR43 (sc-32906, Santa Cruz), GPR41 (sc-98332, Santa Cruz), CPT-1b (sc-20670, Santa Cruz), COX4 (MB0102, Bioworld), HDAC1 (BS6485, Bioworld), GAPDH (AP0063, Bioworld),  $\beta$ -actin (AP0063, Bioworld). The phosphorylated AMPK was normalized by the total AMPK.

## Chromatin immunoprecipitation assay

Approximately 200 mg of frozen muscle samples were homogenized in liquid nitrogen and resuspended in PBS containing protease inhibitor cocktail (no. 11697498001; Roche). Cross-linking of protein and DNA was performed by adding formaldehyde to a final concentration of 1%, and then the reaction was stopped

with 2.5mol/l glycine at room temperature. The reaction mix was centrifuged and the pellets were rinsed with PBS and homogenized in a SDS lysis buffer containing protease inhibitors. Crude chromatin preparations were sonicated on ice to yield DNA fragments of 200 to 500 bp in length and pre-cleared with salmon sperm DNA-treated protein G agarose beads (40 µL, 50% slurry, sc-2003; Santa Cruz). The mixture of pre-cleared chromatin preparations and 2 µg of primary antibody (H3 lysine 9 acetylation, ab4441, Abcam) were incubated overnight at 4°C. A negative control was included with normal IgG. Protein G agarose beads (40 µl, 50% slurry, sc-2003; Santa Cruz) were added to capture the immunoprecipitated chromatin complexes. Finally, DNA fragments were released from the immunoprecipitated complexes by reverse cross-linking at 65°C for 1 h, and quantitative real-time PCR was used to quantify the fragments of target gene promoters with specific primers (see supplementary Table 1) using purified immunoprecipitated DNA as the template.

## Statistical analysis

All data are presented as mean  $\pm$  SEM. One-way ANOVA with a Bonferroni post hoc test was used to evaluate the statistical significance of differences among 3 groups. A value  $P < 0.05$  was considered statistically significant.

## CONFLICTS OF INTEREST

The authors declare that there is no duality of interest associated with this manuscript.

## FUNDING

This work was supported by the National Basic Research Program of China (2012CB124703), the Fundamental Research Funds for the Central Universities (KYZZ200913), and the Priority Academic Program Development of Jiangsu Higher Education Institutions (PAPD).

## Author contribution

JH performed the experiments and measurements of serum biochemical parameters, analyzed and interpreted the results, and drafted the manuscript. LJ, HL and ZH determined serum cholesterol and hepatic amino acids levels. SP and DC contributed ideas for experimental design. RZ and YJ contributed to experimental concepts and design, provided scientific direction, analyzed and interpreted the results, and finalized the manuscript. All authors read and approved the final manuscript.

## REFERENCES

1. de Lange P, Moreno M, Silvestri E, Lombardi A, Goglia F and Lanni A. Fuel economy in food-deprived skeletal muscle: signaling pathways and regulatory mechanisms. *FASEB journal*. 2007; 21:3431-3441.
2. Shulman GI, Rothman DL, Jue T, Stein P, DeFronzo RA and Shulman RG. Quantitation of muscle glycogen synthesis in normal subjects and subjects with non-insulin-dependent diabetes by <sup>13</sup>C nuclear magnetic resonance spectroscopy. *The New England journal of medicine*. 1990; 322:223-228.
3. Lee-Young RS, Bonner JS, Mayes WH, Iwueke I, Barrick BA, Hasenour CM, Kang L and Wasserman DH. AMP-activated protein kinase (AMPK)alpha2 plays a role in determining the cellular fate of glucose in insulin-resistant mouse skeletal muscle. *Diabetologia*. 2013; 56:608-617.
4. Kelley DE, Goodpaster B, Wing RR and Simoneau JA. Skeletal muscle fatty acid metabolism in association with insulin resistance, obesity, and weight loss. *The American journal of physiology*. 1999; 277:E1130-1141.
5. van der Heijden RA, Sheedfar F, Morrison MC, Hommelberg PP, Kor D, Kloosterhuis NJ, Gruben N, Youssef SA, de Bruin A, Hofker MH, Kleemann R, Koonen DP and Heeringa P. High-fat diet induced obesity primes inflammation in adipose tissue prior to liver in C57BL/6j mice. *Aging (Albany NY)*. 2015; 7:256-268. doi: 10.18632/aging.100738.
6. Wiesenborn DS, Menon V, Zhi X, Do A, Gesing A, Wang Z, Bartke A, Altomare DA and Masternak MM. The effect of calorie restriction on insulin signaling in skeletal muscle and adipose tissue of Ames dwarf mice. *Aging (Albany NY)*. 2014; 6:900-912. doi: 10.18632/aging.100700.
7. Hirabara SM, Curi R and Maechler P. Saturated fatty acid-induced insulin resistance is associated with mitochondrial dysfunction in skeletal muscle cells. *Journal of cellular physiology*. 2010; 222:187-194.
8. Patti ME, Butte AJ, Crunkhorn S, Cusi K, Berria R, Kashyap S, Miyazaki Y, Kohane I, Costello M, Saccone R, Landaker EJ, Goldfine AB, Mun E, DeFronzo R, Finlayson J, Kahn CR, et al. Coordinated reduction of genes of oxidative metabolism in humans with insulin resistance and diabetes: Potential role of PGC1 and NRF1. *Proceedings of the National Academy of Sciences of the United States of America*. 2003; 100:8466-8471.
9. Kelley DE, He J, Menshikova EV and Ritov VB. Dysfunction of mitochondria in human skeletal muscle in type 2 diabetes. *Diabetes*. 2002; 51:2944-2950.
10. Galgani JE, Johannsen NM, Bajpeyi S, Costford SR, Zhang Z, Gupta AK and Ravussin E. Role of skeletal muscle mitochondrial density on exercise-stimulated lipid oxidation. *Obesity*. 2012; 20:1387-1393.
11. Meex RC, Schrauwen-Hinderling VB, Moonen-Kornips E, Schaart G, Mensink M, Phielix E, van de Weijer T, Sels JP, Schrauwen P and Hesselink MK. Restoration of muscle mitochondrial function and metabolic flexibility in type 2 diabetes by exercise training is paralleled by increased myocellular fat storage and improved insulin sensitivity. *Diabetes*. 2010; 59:572-579.
12. Solomon TP, Sistrun SN, Krishnan RK, Del Aguila LF, Marchetti CM, O'Carroll SM, O'Leary VB and Kirwan JP. Exercise and diet enhance fat oxidation and reduce insulin resistance in older obese adults. *Journal of applied physiology*. 2008; 104:1313-1319.
13. Pryde SE, Duncan SH, Hold GL, Stewart CS and Flint HJ. The microbiology of butyrate formation in the human colon. *FEMS microbiology letters*. 2002; 217:133-139.
14. Berni Canani R, Di Costanzo M and Leone L. The epigenetic effects of butyrate: potential therapeutic implications for clinical practice. *Clinical epigenetics*. 2012; 4:4.
15. Davie JR. Inhibition of histone deacetylase activity by butyrate. *The Journal of nutrition*. 2003; 133:2485S-2493S.
16. Brown AJ, Goldsworthy SM, Barnes AA, Eilert MM, Tcheang L, Daniels D, Muir AI, Wigglesworth MJ, Kinghorn I, Fraser NJ, Pike NB, Strum JC, Steplewski KM, Murdock PR, Holder JC, Marshall FH, et al. The Orphan G protein-coupled receptors GPR41 and GPR43 are activated by propionate and other short chain carboxylic acids. *The Journal of biological chemistry*. 2003; 278:11312-11319.
17. Henagan TM, Stefanska B, Fang Z, Navard AM, Ye J, Lenard NR and Devarshi PP. Sodium butyrate epigenetically modulates high-fat diet-induced skeletal muscle mitochondrial adaptation, obesity and insulin resistance through nucleosome positioning. *British journal of pharmacology*. 2015; 172:2782-2798.
18. Vinolo MA, Rodrigues HG, Festuccia WT, Crisma AR, Alves VS, Martins AR, Amaral CL, Fiamoncini J, Hirabara SM, Sato FT, Fock RA, Malheiros G, dos Santos MF and Curi R. Tributyrin attenuates obesity-associated inflammation and insulin resistance in high-fat-fed mice. *American journal of physiology Endocrinology and metabolism*. 2012; 303:E272-282.
19. Gao Z, Yin J, Zhang J, Ward RE, Martin RJ, Lefevre M, Cefalu WT and Ye J. Butyrate improves insulin sensitivity and increases energy expenditure in mice. *Diabetes*. 2009; 58:1509-1517.
20. Mattace Raso G, Simeoli R, Russo R, Iacono A, Santoro A, Paciello O, Ferrante MC, Canani RB, Calignano A and Meli R. Effects of sodium butyrate and its synthetic amide derivative on liver inflammation and glucose tolerance in an animal model of steatosis induced by high fat diet. *PLoS one*. 2013; 8:e68626.
21. Adams AC and Kharitonov A. FGF21 drives a shift in adipokine tone to restore metabolic health. *Aging (Albany NY)*. 2013; 5:386-387. doi: 10.18632/aging.100565.

22. Civitarese AE, Ukropcova B, Carling S, Hulver M, DeFronzo RA, Mandarino L, Ravussin E and Smith SR. Role of adiponectin in human skeletal muscle bioenergetics. *Cell metabolism*. 2006; 4:75-87.
23. Yamauchi T, Kamon J, Waki H, Terauchi Y, Kubota N, Hara K, Mori Y, Ide T, Murakami K, Tsuboyama-Kasaoka N, Ezaki O, Akanuma Y, Gavrilova O, Vinson C, Reitman ML, Kagechika H, et al. The fat-derived hormone adiponectin reverses insulin resistance associated with both lipotrophy and obesity. *Nature medicine*. 2001; 7:941-946.
24. Fruebis J, Tsao TS, Javorschi S, Ebbets-Reed D, Erickson MR, Yen FT, Bihain BE and Lodish HF. Proteolytic cleavage product of 30-kDa adipocyte complement-related protein increases fatty acid oxidation in muscle and causes weight loss in mice. *Proceedings of the National Academy of Sciences of the United States of America*. 2001; 98:2005-2010.
25. Yamauchi T, Nio Y, Maki T, Kobayashi M, Takazawa T, Iwabu M, Okada-Iwabu M, Kawamoto S, Kubota N, Kubota T, Ito Y, Kamon J, Tsuchida A, Kumagai K, Kozono H, Hada Y, et al. Targeted disruption of AdipoR1 and AdipoR2 causes abrogation of adiponectin binding and metabolic actions. *Nature medicine*. 2007; 13:332-339.
26. Yamauchi T, Kamon J, Minokoshi Y, Ito Y, Waki H, Uchida S, Yamashita S, Noda M, Kita S, Ueki K, Eto K, Akanuma Y, Froguel P, Foufelle F, Ferre P, Carling D, et al. Adiponectin stimulates glucose utilization and fatty-acid oxidation by activating AMP-activated protein kinase. *Nature medicine*. 2002; 8:1288-1295.
27. Yamauchi T, Kamon J, Waki H, Imai Y, Shimozawa N, Hioki K, Uchida S, Ito Y, Takakuwa K, Matsui J, Takata M, Eto K, Terauchi Y, Komeda K, Tsunoda M, Murakami K, et al. Globular adiponectin protected ob/ob mice from diabetes and ApoE-deficient mice from atherosclerosis. *The Journal of biological chemistry*. 2003; 278:2461-2468.
28. Yamauchi T, Kamon J, Ito Y, Tsuchida A, Yokomizo T, Kita S, Sugiyama T, Miyagishi M, Hara K, Tsunoda M, Murakami K, Ohteki T, Uchida S, Takekawa S, Waki H, Tsuno NH, et al. Cloning of adiponectin receptors that mediate antidiabetic metabolic effects. *Nature*. 2003; 423:762-769.
29. den Besten G, Bleeker A, Gerding A, van Eunen K, Havinga R, van Dijk TH, Oosterveer MH, Jonker JW, Groen AK, Reijngoud DJ and Bakker BM. Short-Chain Fatty Acids Protect Against High-Fat Diet-Induced Obesity via a PPARgamma-Dependent Switch From Lipogenesis to Fat Oxidation. *Diabetes*. 2015; 64:2398-2408.
30. Li HP, Chen X and Li MQ. Butyrate alleviates metabolic impairments and protects pancreatic beta cell function in pregnant mice with obesity. *International journal of clinical and experimental pathology*. 2013; 6:1574-1584.
31. Lin HV, Frassetto A, Kowalik EJ, Jr., Nawrocki AR, Lu MM, Kosinski JR, Hubert JA, Szeto D, Yao X, Forrest G and Marsh DJ. Butyrate and propionate protect against diet-induced obesity and regulate gut hormones via free fatty acid receptor 3-independent mechanisms. *PloS one*. 2012; 7:e35240.
32. Chen LL, Zhang HH, Zheng J, Hu X, Kong W, Hu D, Wang SX and Zhang P. Resveratrol attenuates high-fat diet-induced insulin resistance by influencing skeletal muscle lipid transport and subsarcolemmal mitochondrial beta-oxidation. *Metabolism*. 2011; 60:1598-1609.
33. Choi WH, Um MY, Ahn J, Jung CH and Ha TY. Long-term intake of rice improves insulin sensitivity in mice fed a high-fat diet. *Nutrition*. 2014; 30:920-927.
34. Sun X, He J, Mao C, Han R, Wang Z, Liu Y and Chen Y. Negative regulation of adiponectin receptor 1 promoter by insulin via a repressive nuclear inhibitory protein element. *FEBS letters*. 2008; 582:3401-3407.
35. Park HJ, Kang YM, Kim CH and Jung MH. ATF3 negatively regulates adiponectin receptor 1 expression. *Biochemical and biophysical research communications*. 2010; 400:72-77.
36. Liang X, Hu M, Rogers CQ, Shen Z and You M. Role of SIRT1-FoxO1 signaling in dietary saturated fat-dependent upregulation of liver adiponectin receptor 2 in ethanol-administered mice. *Antioxidants & redox signaling*. 2011; 15:425-435.
37. Sun X, Han R, Wang Z and Chen Y. Regulation of adiponectin receptors in hepatocytes by the peroxisome proliferator-activated receptor-gamma agonist rosiglitazone. *Diabetologia*. 2006; 49:1303-1310.
38. Goldman N, Chen M, Fujita T, Xu Q, Peng W, Liu W, Jensen TK, Pei Y, Wang F, Han X, Chen JF, Schnermann J, Takano T, Bekar L, Tieu K and Nedergaard M. Adenosine A1 receptors mediate local anti-nociceptive effects of acupuncture. *Nature neuroscience*. 2010; 13:883-888.
39. Smith DJ, Stokes BO and Boyer PD. Probes of initial phosphorylation events in ATP synthesis by chloroplasts. *The Journal of biological chemistry*. 1976; 251:4165-4171.
40. Livak KJ and Schmittgen TD. Analysis of relative gene expression data using real-time quantitative PCR and the 2(-Delta Delta C(T)) Method. *Methods*. 2001; 25:402-408.
41. Jia Y, Cong R, Li R, Yang X, Sun Q, Parvizi N and Zhao R. Maternal low-protein diet induces gender-dependent changes in epigenetic regulation of the glucose-6-phosphatase gene in newborn piglet liver. *The Journal of nutrition*. 2012; 142:1659-1665.
